# Supplementary material for: Phase transition metal–crown ether coordination compounds tuned by metal ions
Source: Royal Society of Chemistry journal article supplement (doi:10.1039/c5dt02631h), 2015-11-23
Supplement: c5dt02631h1.pdf [file c5dt02631h1.pdf]

## Supporting information:

### Phase Transition Metal-Crown Ether Coordination Compounds

#### Tuned by Metal ion

*Qiong Ye\**, *Hui-Ting Wang*, *Lin Zhou*, *Li-Hui Kong*, *Heng-Yun Ye*, *Da-*

*Wei Fu\**, *Yi Zhang*

Ordered Matter Science Research Center, Southeast University, Nanjing 211189, P. R.

China

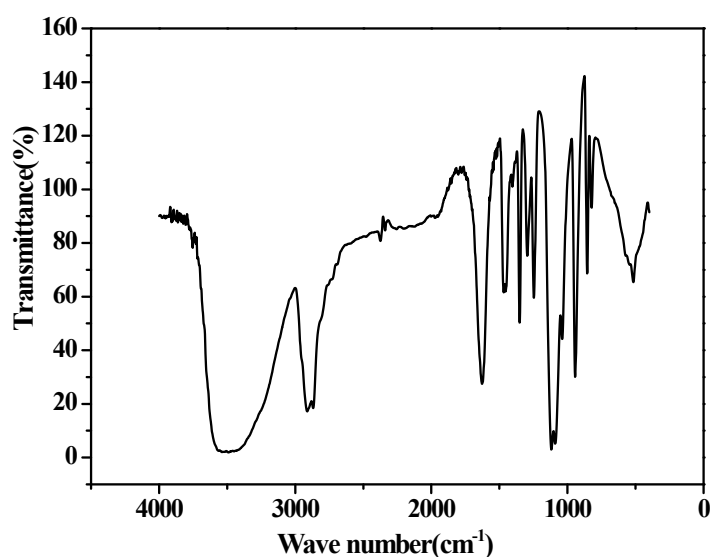

Figure S1 the IR spectrum of compound **1**, where the strong signal at 3500 cm<sup>-1</sup> is due to the moisture of the KBr used for IR.

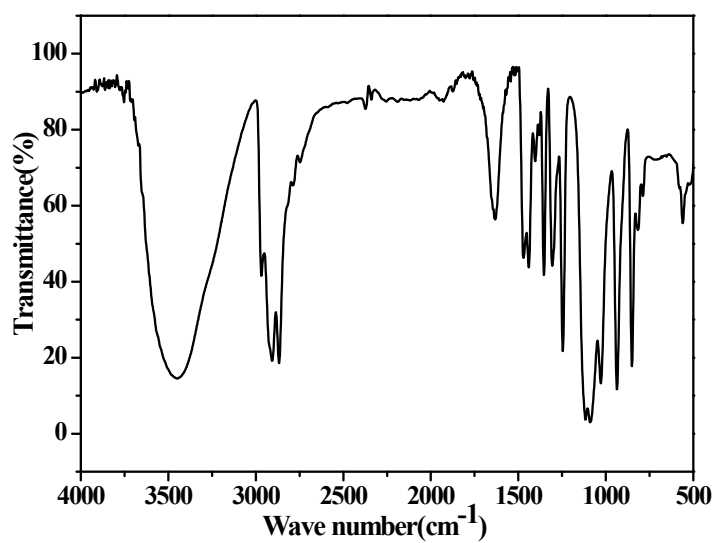

Figure S2 The IR spectrum of compound **2**, where the strong signal at 3500  $\text{cm}^{-1}$  is due to the moisture of the KBr used for IR.

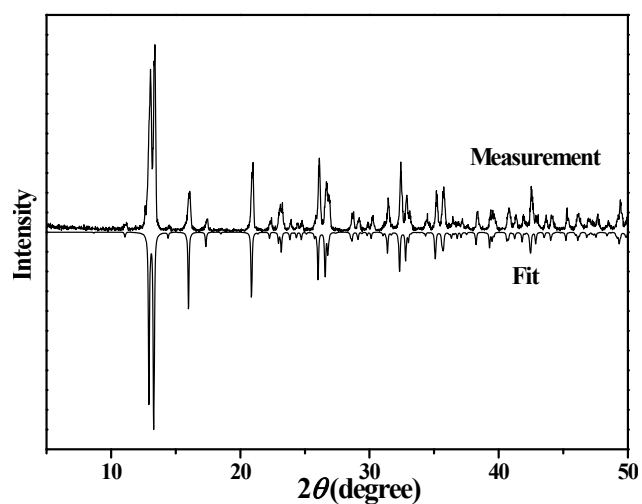

Figure S3 The powder XRD measurement result of compound **1**

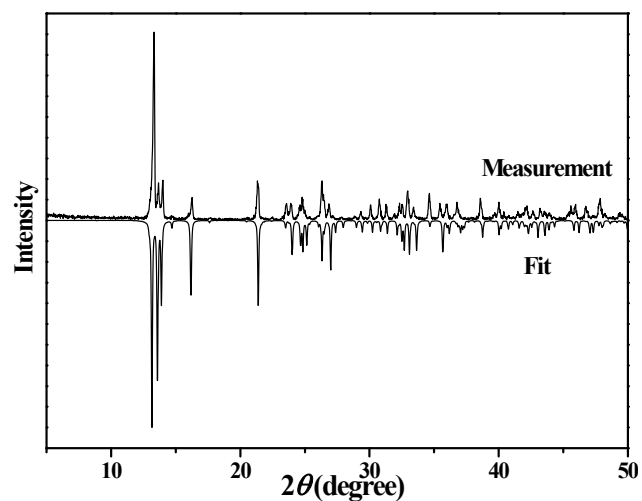

Figure S4 . The powder XRD measurement result of compound 2

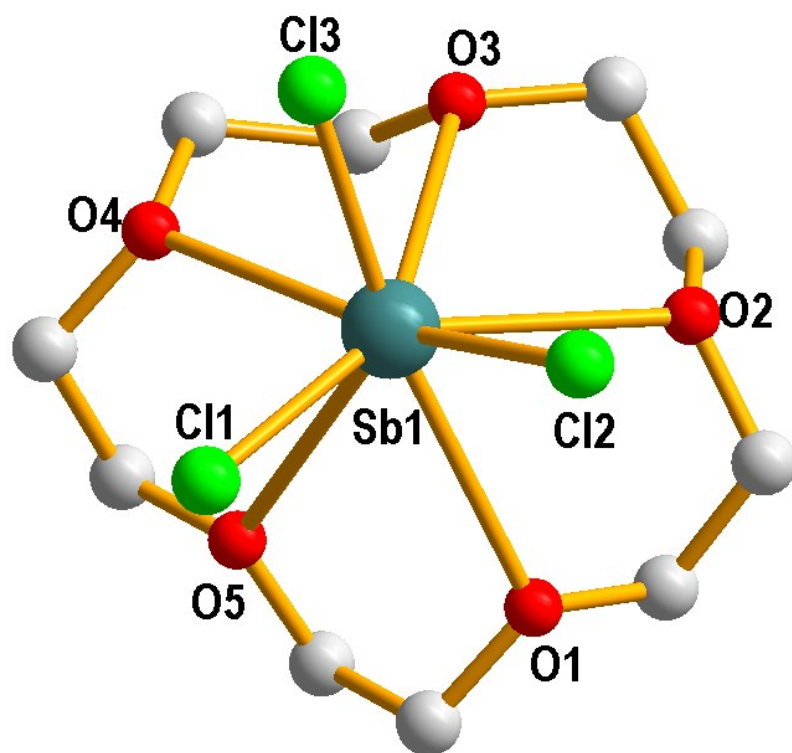

Figure S5 The molecular structure of compound 2

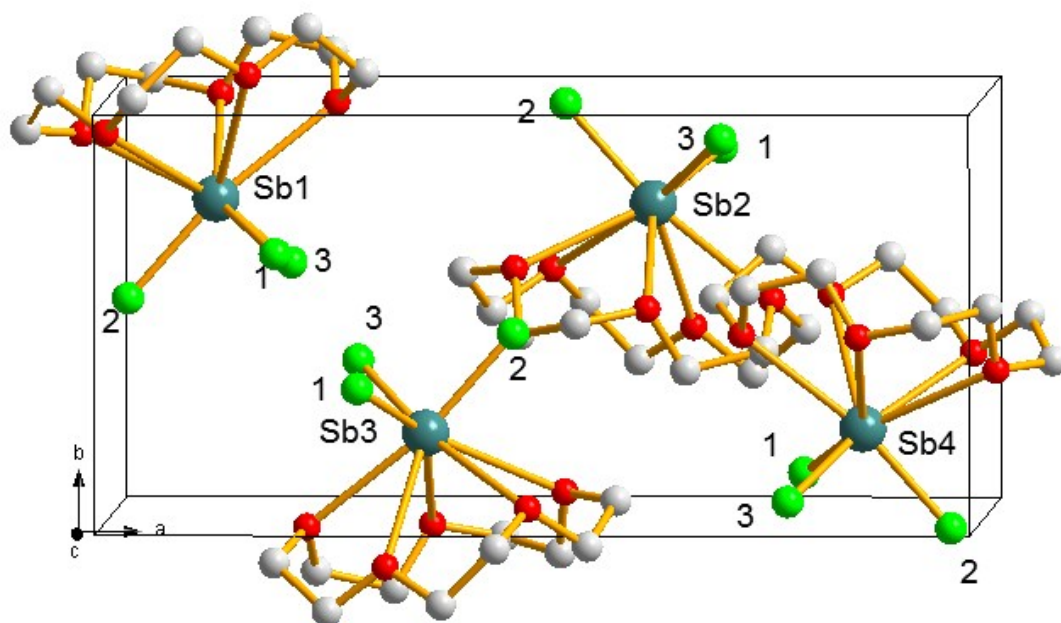

Figure S6 the cell packing view of compound 2 at 293K.

Table S1 The key bond distances and angles of compound 2 at 173 K, 273 K and 293 K

|             | 173K        | 273K        | 293K       |
|-------------|-------------|-------------|------------|
| Sb1—C11     | 2.4078 (10) | 2.4045 (12) | 2.404(10)  |
| Sb1—C12     | 2.4392 (9)  | 2.4334 (11) | 2.429 (9)  |
| Sb1—C13     | 2.4140 (9)  | 2.4118 (12) | 2.409 (10) |
| Sb1—O1      | 2.9023 (18) | 2.912 (3)   | 3.041(2)   |
| Sb1—O2      | 2.943 (2)   | 2.941 (3)   | 2.831(1)   |
| Sb1—O3      | 2.9387 (19) | 2.960 (3)   | 2.958 (3)  |
| Sb1—O4      | 2.807 (2)   | 2.829 (3)   | 2.937(2)   |
| Sb1—O5      | 3.018 (2)   | 3.034 (3)   | 2.912(8)   |
|             |             |             |            |
| C11—Sb1—C12 | 90.47 (3)   | 90.53 (4)   | 93.53 (4)  |
| C11—Sb1—C13 | 93.37 (4)   | 93.48 (5)   | 90.61 (3)  |
| C13—Sb1—C12 | 88.83 (3)   | 89.10 (4)   | 89.16 (4)  |
| C11—Sb1—O1  | 90.15 (5)   | 90.75 (6)   | 78.25(2)   |
| C11—Sb1—O2  | 147.24 (4)  | 147.56 (6)  | 89.10(1)   |
| C11—Sb1—O3  | 149.85 (4)  | 149.44 (7)  | 167.37(1)  |
| C11—Sb1—O4  | 88.94 (5)   | 89.20 (7)   | 132.75     |
| C11—Sb1—O5  | 73.72 (5)   | 73.84 (6)   | 73.79 (5)  |
| C12—Sb1—O1  | 82.63 (5)   | 82.94 (7)   | 134.98     |
| C12—Sb1—O2  | 74.57 (5)   | 75.03 (6)   | 56.74(2)   |
| C12—Sb1—O3  | 117.87 (4)  | 118.28 (7)  | 78.15(2)   |
| C12—Sb1—O4  | 166.47 (4)  | 167.15 (6)  | 149.18(1)  |
| C12—Sb1—O5  | 135.26 (4)  | 135.23 (6)  | 118.53(1)  |
| C13—Sb1—O1  | 170.79 (4)  | 171.03 (6)  | 60.24(3)   |
| C13—Sb1—O2  | 114.81 (5)  | 114.74 (6)  | 57.98(6)   |
| C13—Sb1—O3  | 78.14(5)    | 78.06 (7)   | 170.96(1)  |
| C13—Sb1—O4  | 77.72 (5)   | 78.09 (7)   | 90.92(5)   |
| C13—Sb1—O5  | 132.66 (4)  | 132.54 (6)  | 82.91(4)   |
| O1—Sb1—O2   | 59.56 (6)   | 59.17(8)    | 109.71(5)  |
| O1—Sb1—O3   | 102.81 (6)  | 102.05 (8)  | 56.16(2)   |
| O1—Sb1—O5   | 56.54 (5)   | 56.33 (8)   | 101.81     |
| O2—Sb1—O5   | 96.38 (5)   | 58.06 (8)   | 59.14(3)   |
| O3—Sb1—O2   | 58.27 (5)   | 95.96 (8)   | 118.53(2)  |
| O3—Sb1—O5   | 90.75 (6)   | 90.24 (8)   | 60.23(8)   |
| O4—Sb1—O1   | 110.88(6)   | 109.91 (9)  | 90.08(1)   |
| O4—Sb1—O2   | 112.24 (6)  | 111.19 (9)  | 114.58(5)  |
| O4—Sb1—O3   | 61.06(5)    | 60.41 (8)   | 147.76(2)  |
| O4—Sb1—O5   | 57.18(5)    | 56.70 (8)   | 75.11(7)   |

Table S2 The Torsion angles of 15-crown-5 ether in compound 2 at 173 K, 273 K and 293 K

|             | 173K      | 273 K     | 293 K     |
|-------------|-----------|-----------|-----------|
| C1—C2—O2—C3 | -79.1 (3) | -79.4 (4) | -79.4 (4) |

|              |              |            |            |
|--------------|--------------|------------|------------|
| C1—O1—C10—C9 | -81.6(3)     | -82.2 (4)  | -82.1 (4)  |
| C10—O1—C1—C2 | 178.5 (2)    | 178.5 (3)  | 178.5 (3)  |
| C2—O2—C3—C4  | -179.98 (19) | 179.8 (3)  | 179.5 (3)  |
| C4—O3—C5—C6  | -169.3 (2)   | -170.7 (3) | -170.2 (3) |
| C5—O3—C4—C3  | -76.8 (3)    | -78.1 (4)  | -78.8 (4)  |
| C6—O4—C7—C8  | 76.3 (3)     | 76.7 (5)   | 77.7 (4)   |
| C7—O4—C6—C5  | -109.4 (3)   | -110.1 (4) | -110.4 (4) |
| C8—O5—C9—C10 | -175.0 (2)   | -175.6 (3) | -176.0 (3) |
| C9—O5—C8—C7  | 178.2 (2)    | 178.7 (3)  | 179.7 (3)  |
| O1—C10—C9—O5 | -58.9 (3)    | -59.1 (4)  | -59.3 (4)  |
| O2—C2—C1—O1  | -64.9 (3)    | -64.8 (4)  | -65.3 (4)  |
| O3—C5—C6—O4  | -66.9 (3)    | -66.0 (5)  | -65.4 (5)  |
| O3—C4—C3—O2  | -62.0 (3)    | -61.0(5)   | -61.2 (4)  |
| O4—C7—C8—O5  | 59.4 (3)     | 59.8 (5)   | 59.3 (4)   |

Table S3 The average bond distances of compound **1** and **2**

|       | 173K   | 293K   | 373K   |       | 173K   | 273K   | 293K   |
|-------|--------|--------|--------|-------|--------|--------|--------|
| Bi—Cl | 2.5407 | 2.535  | 2.5307 | Sb—Cl | 2.4203 | 2.4166 | 2.414  |
| Bi—O  | 2.8414 | 2.8446 | 2.854  | Sb—O  | 2.9218 | 2.9352 | 2.9358 |

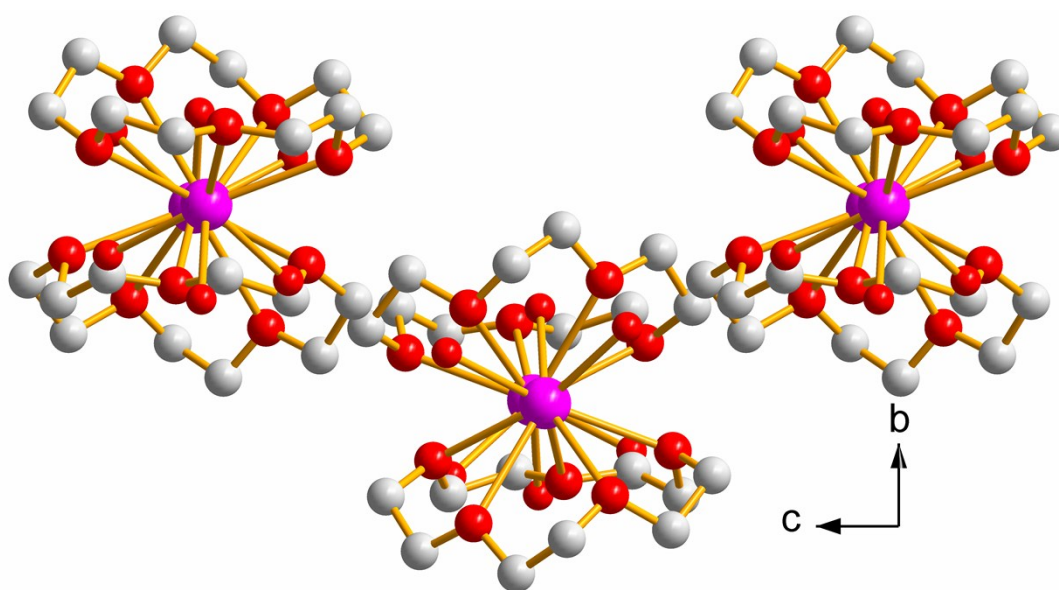

Figure S7 the packing view of compound **1** along *a* axis

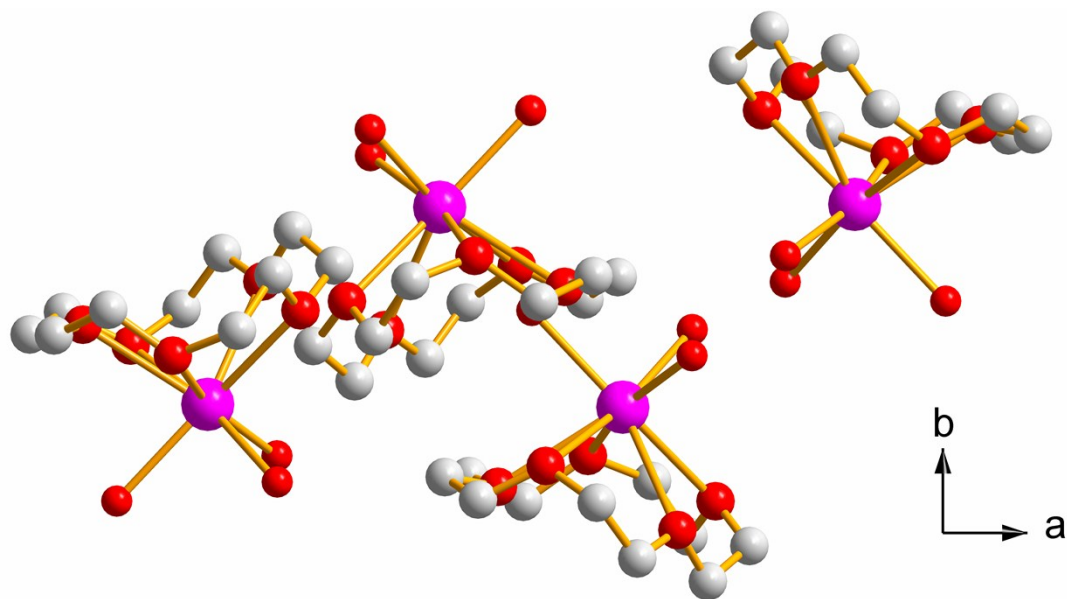

Figure S8 The packing view of compound **1** along *c* axis

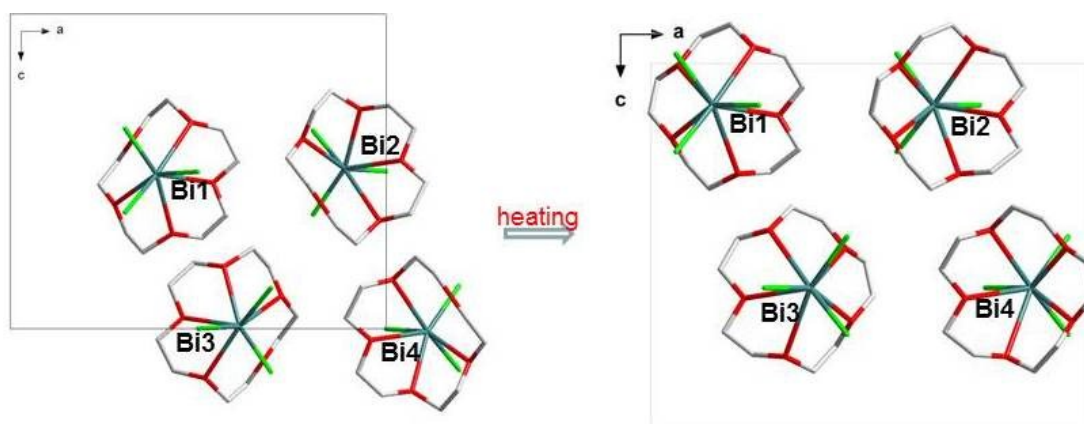

Figure S9 The packing view of compound **1** along *b* axis, where Bi1, Bi2, Bi3 and Bi4 correspond to the atoms listed in Table 3

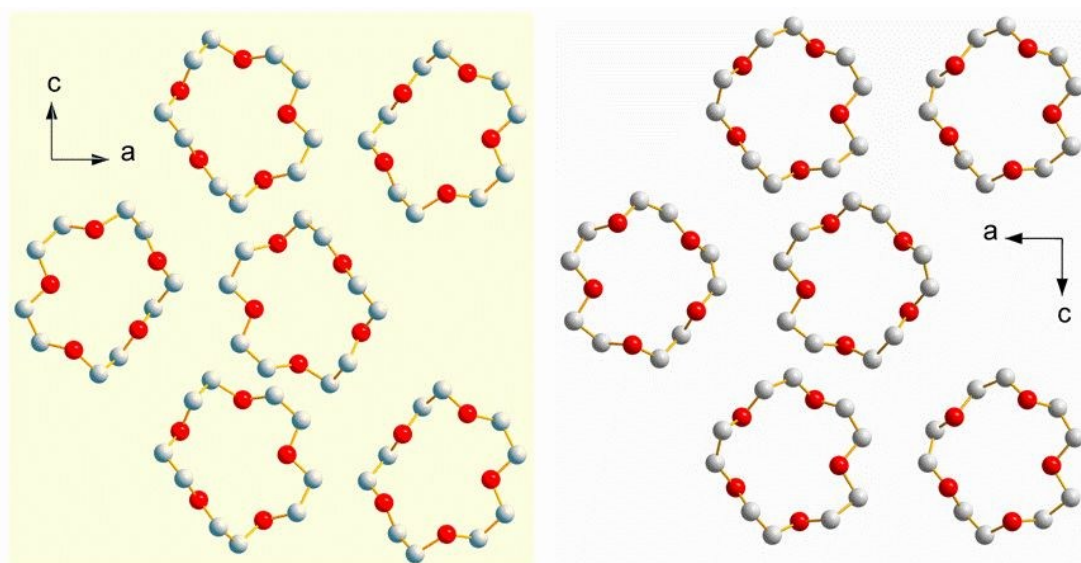

Figure S10 the packing view of 15-crown-5 at 173K(left) and 383K(right) along *b*

axis

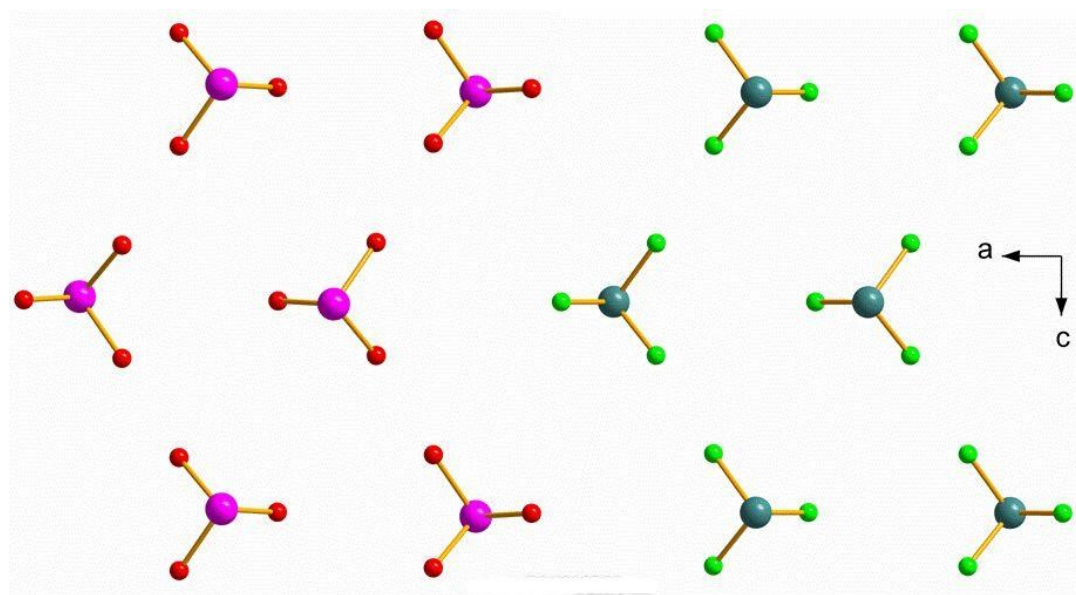

Figure S11 the packing view of compound **1** at 173K(left) and 383K(right) along b axis, where the 15-crown-5 have been omitted for clarity

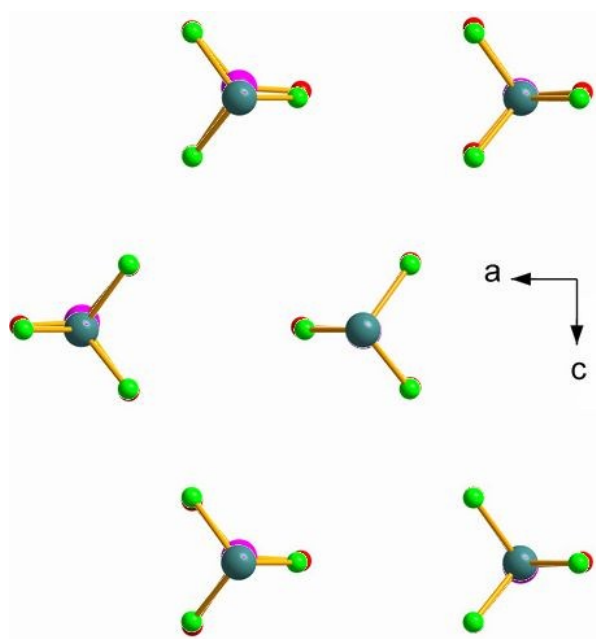

Figure S12 the overlap view of compound **1** in 173K low-temperature phase and 383K high-temperature phase along b axis, where the 15-crown-5 have been omitted for clarity



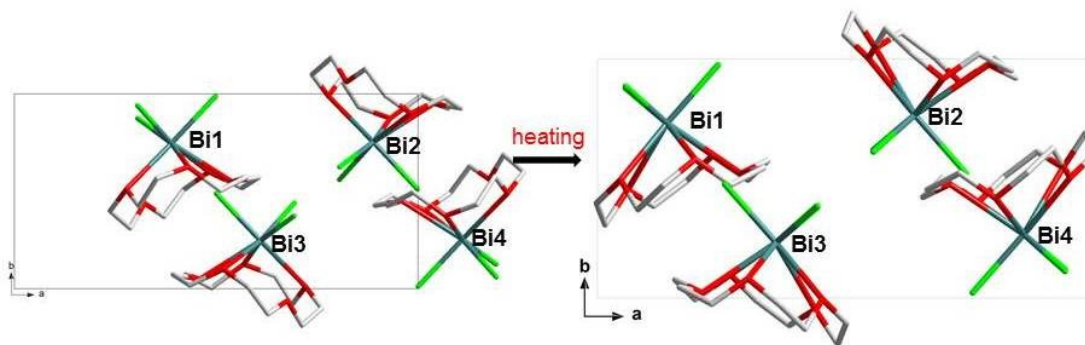

Figure S13 The packing view of compound **1** along *c* axis, where Bi1, Bi2, Bi3 and Bi4 correspond to the atoms listed in Table 3

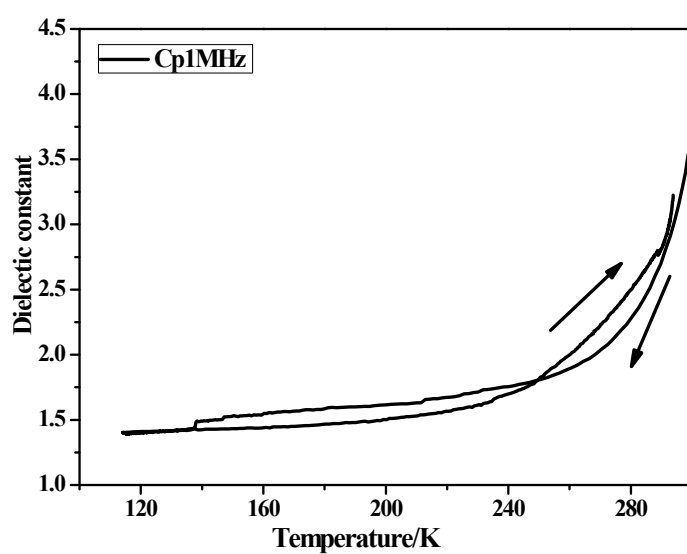

Figure S14 the dielectric constant of compound **1** from 110K to 300K

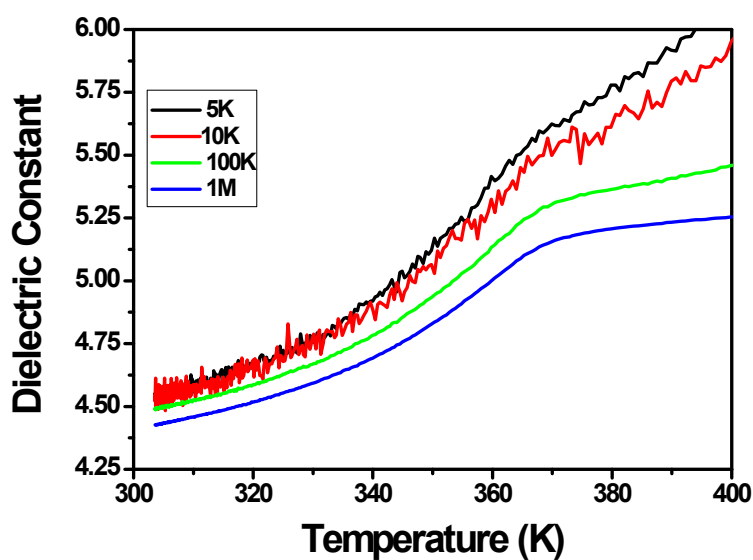



Figure S15 the temperature and frequency dependent dielectric constant of compound **1**

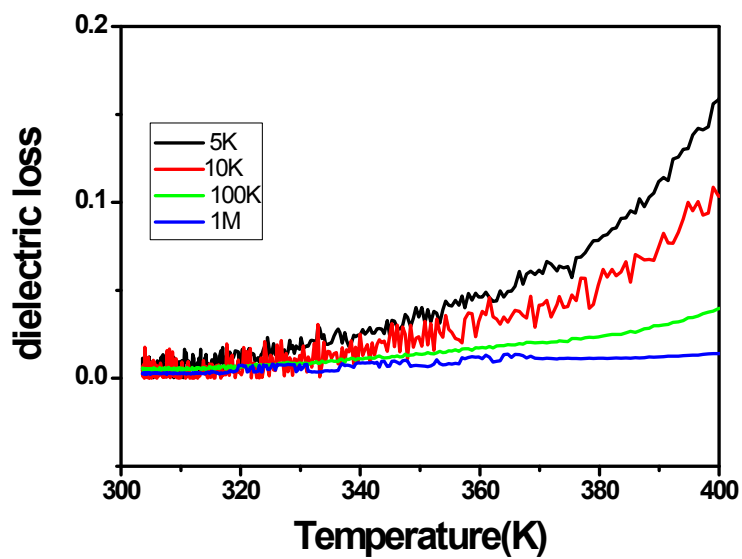

Figure S16 the temperature and frequency dependent dielectric loss of compound **1**

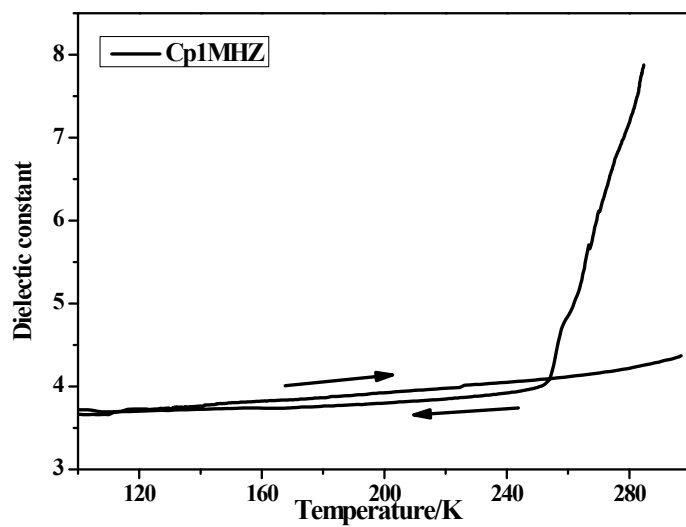

Figure S17 the dielectric constant of compound **2** from 100K to 300K

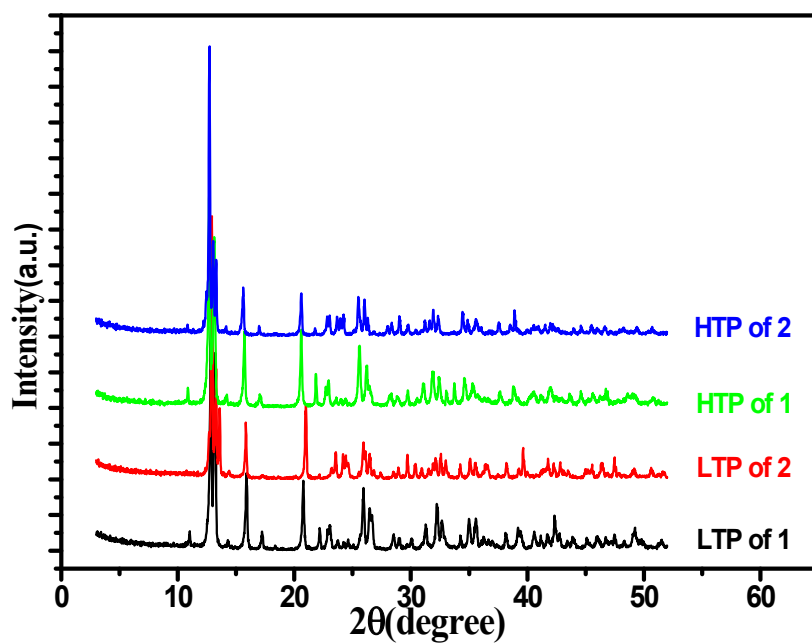

Figure S18 The powder X-ray diffraction of high temperature phases and low temperature phases of compounds 1 and 2.

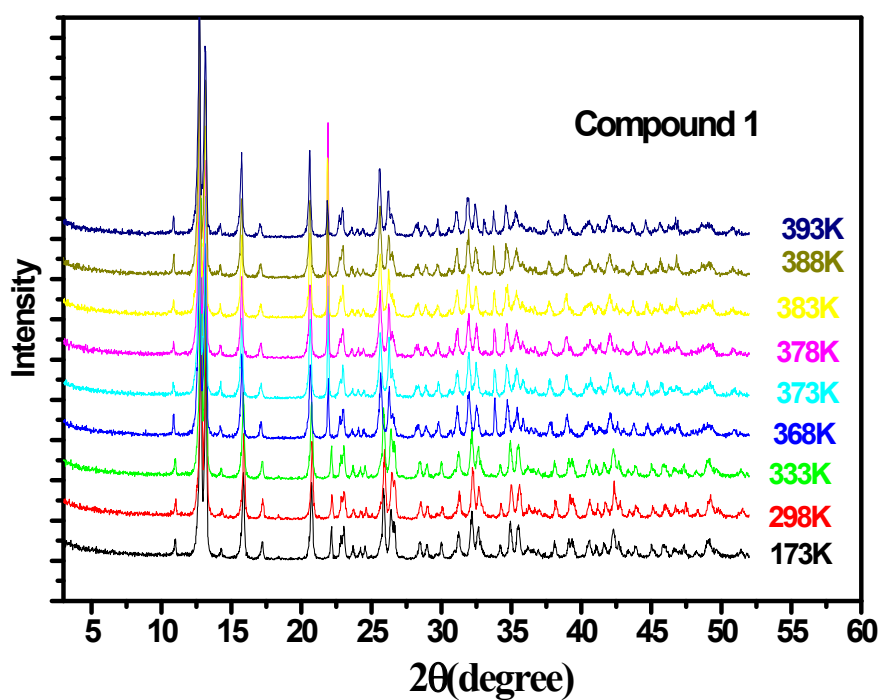

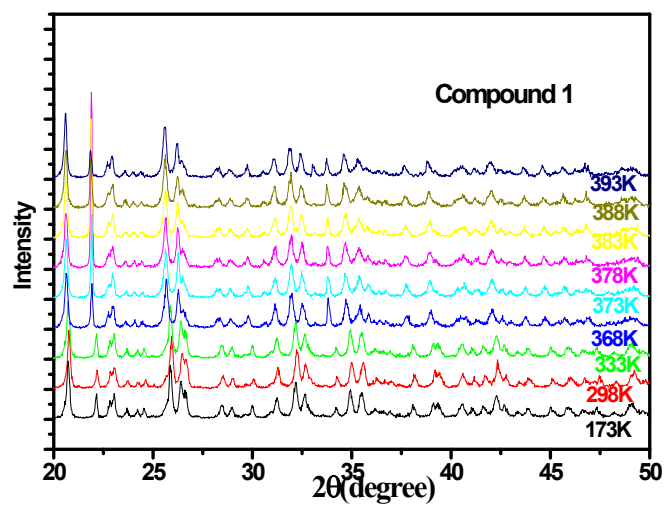

Figure S19 The temperature-variable powder X-ray diffraction of compound 1. The spectrum shows slightly change in the 2 $\theta$  range of 20-50° after the phase transition occurred.

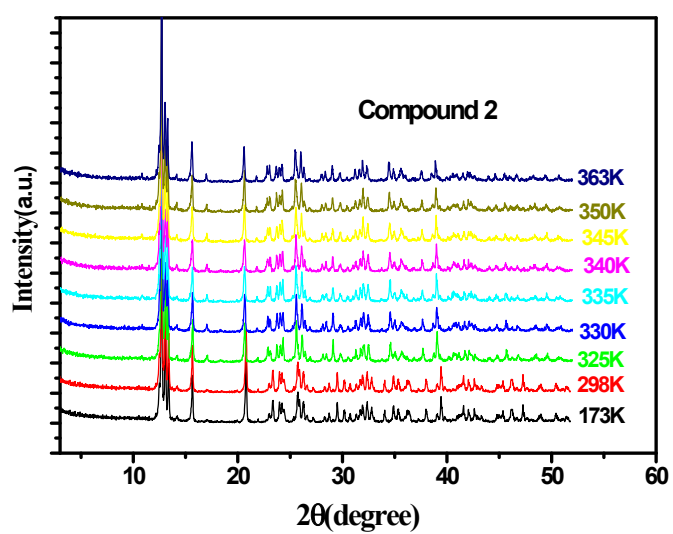

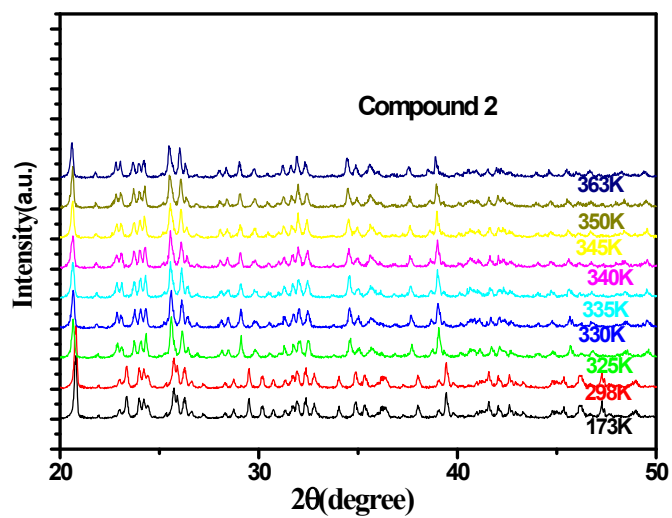

Figure S20 The temperature-variable powder X-ray diffraction of compound 2. The spectrum shows slightly change in the  $2\theta$  range of  $20-50^\circ$  after the phase transition occurred.

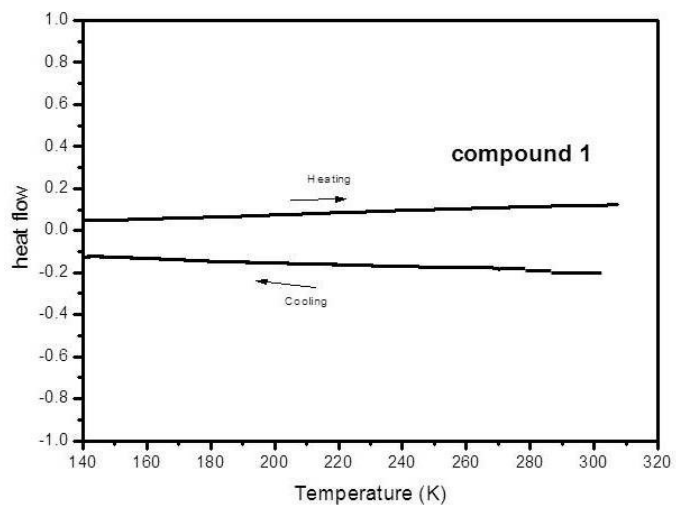

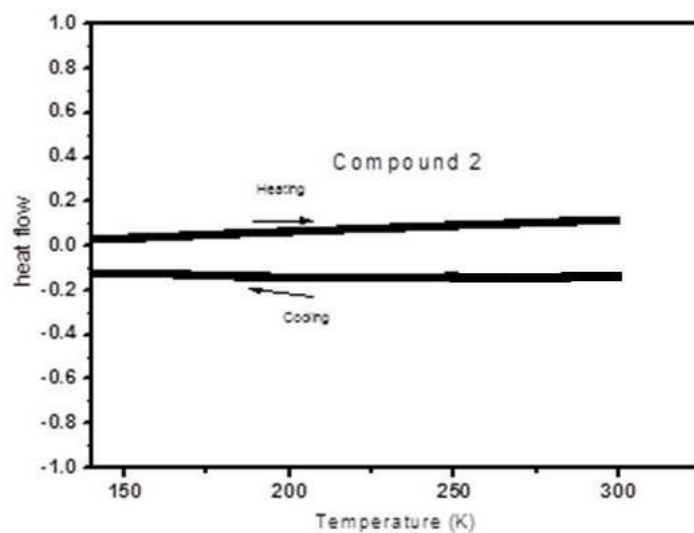

Figure S21 DSC measurement results of compound 1 and 2 from 140 to room temperature.
